# Supplementary material for: Cardiac Vulnerability to Cerebrogenic Stress as a Possible Cause of Troponin Elevation in Stroke
Source: PubMed Central journal article supplement — J Am Heart Assoc. 2016 Oct 6;5(10):e004135. doi: 10.1161/JAHA.116.004135 (PMC5121511; doi:10.1161/jaha.116.004135), 2016-10-06
Supplement: JAH3-5-e004135-s001.pdf [file JAH3-5-e004135-s001.pdf]

# **SUPPLEMENTAL MATERIAL**

**Table S1. Previous medications affecting QTc-interval in patients with and without troponin elevation**

| Variable                             | Cardiac troponin I    |                            | <i>p</i> -value† |
|--------------------------------------|-----------------------|----------------------------|------------------|
|                                      | Elevated<br>(n = 121) | Non-elevated<br>(n = 1283) |                  |
| Previous medications                 |                       |                            |                  |
| ACEIs or ARBs                        | 37 (30.6)             | 299 (23.3)                 | 0.07             |
| Calcium channel blockers             | 43 (35.3)             | 435 (33.9)                 | 0.72             |
| Beta-blockers                        | 29 (24.0)             | 208 (16.2)                 | 0.03             |
| Digoxin                              | 4 (3.3)               | 27 (2.1)                   | 0.33             |
| Other QTc-interval prolonging drugs* | 7 (5.8)               | 105 (8.2)                  | 0.35             |

Variables are presented as number (%).

ACEI = angiotensin-converting enzyme inhibitor; ARB = angiotensin receptor blocker.

\*QTc-interval prolonging drugs by the Anatomical Therapeutic Chemical (ATC) code include Cilostazol (B01AC23), Domperidone (A03FA03), Flecainide (C01BC04), Amiodarone (C01BD01), Sotalol (C07AA07), Nicardipine (C08CA04), Solifenacin (G04BD08), Azithromycin (J01FA10), Ofloxacin (J01MA01), Ciprofloxacin (J01MA02), Tamoxifen (L02BA01), Tacrolimus (L04AD02), Tizanidine (M03BX02), Amantadine (N04BB01), Quetiapine (N05AH04), Lithium (N05AN01), Risperidone (N05AX08), Fluoxetine (N06AB03), Citalopram (N06AB04), Sertraline (N06AB06), Escitalopram (N06AB10), Galantamine (N06DA04), Imipramine (N06AA02, N06AA02), Amitriptyline (N06AA09), and Diphenhydramine (R06AA02) that are listed on [www.qtdrugs.org](http://www.qtdrugs.org).

†*p*-values are calculated by Pearson chi-square test or Fisher's exact test as appropriate

**Table S2. Comparison of clinical variables between patients with or without echocardiography**

| Variable                               | Echocardiography       |                            | <i>p</i> -value† |
|----------------------------------------|------------------------|----------------------------|------------------|
|                                        | Performed<br>(n = 792) | Not-performed<br>(n = 612) |                  |
| Age (years)                            | 64.8 ± 12.5            | 65.2 ± 12.3                | 0.63             |
| Male                                   | 482 (60.9)             | 370 (60.5)                 | 0.88             |
| Heart rate (beats per minute)          | 76.9 ± 17.9            | 78.6 ± 17.6                | 0.08             |
| Hypertension                           | 461 (58.2)             | 387 (63.2)                 | 0.06             |
| Diabetes mellitus                      | 169 (21.3)             | 144 (23.5)                 | 0.33             |
| Hyperlipidemia                         | 169 (21.3)             | 130 (21.2)                 | 0.97             |
| Current smoking                        | 248 (31.3)             | 198 (32.4)                 | 0.68             |
| History of ischemic heart disease      | 115 (14.5)             | 36 (5.9)                   | <0.01            |
| NIHSS score on admission, median [IQR] | 4 [2, 9]               | 4 [2, 7]                   | 0.14             |
| Insular cortical lesion                | 233 (29.4)             | 101 (16.5)                 | <0.01            |
| Stroke subtypes                        |                        |                            | <0.01            |
| Large artery atherosclerosis           | 245 (30.9)             | 196 (32.0)                 |                  |
| Cardiogenic embolism                   | 299 (37.8)             | 66 (10.8)                  |                  |
| Small vessel disease                   | 94 (11.9)              | 243 (39.7)                 |                  |
| Undetermined etiology                  | 109 (13.8)             | 72 (11.8)                  |                  |
| Other etiology                         | 45 (5.7)               | 35 (5.7)                   |                  |
| Abnormal ECG findings                  |                        |                            |                  |
| QTc-prolongation                       | 270 (34.1)             | 187 (30.6)                 | 0.16             |
| Non-elevated ST-T change               | 225 (28.4)             | 154 (25.2)                 | 0.17             |

|              |            |            |       |
|--------------|------------|------------|-------|
| LVH          | 209 (26.4) | 146 (23.9) | 0.28  |
| AF           | 189 (23.9) | 59 (9.6)   | <0.01 |
| Q-wave       | 67 (8.5)   | 53 (8.7)   | 0.89  |
| ST elevation | 22 (2.8)   | 16 (2.6)   | 0.85  |

Variables are presented as mean  $\pm$  SD, median [interquartile range], or number (%).

NIHSS = National Institutes of Health Stroke Scale; ECG = electrocardiography; LVH = left ventricular hypertrophy; AF = atrial fibrillation.

†*p*-values are calculated by Pearson chi-square test or Student's *t*-test as appropriate
